# Supplementary material for: Powerful Electron-Transfer Screen-Printed Platforms as Biosensing Tools: The Case of Uric Acid Biosensor
Source: MDPI journal article supplement (doi:10.3390/bios12010002), 2021-12-21
Supplement: s1 [file s1]

# Powerful Electron-Transfer Screen-Printed Platforms as Biosensing Tools: The Case of Uric Acid Biosensor

Rocco Cancelliere <sup>1</sup>, Alessio Di Tinno <sup>1</sup>, Antonino Cataldo <sup>2</sup>, Stefano Bellucci <sup>2,\*</sup> and Laura Micheli <sup>1,\*</sup>

<sup>1</sup> Department of Chemical Sciences and Technologies, University of Rome Tor Vergata, Via della Ricerca Scientifica 1, 00133 Roma, Italy; rocco.cancelliere@uniroma2.it (R.C.); alessio.ditinno@uniroma2.it (A.D.T.)

<sup>2</sup> INFN-Laboratori Nazionali di Frascati, Via E. Fermi 54, 00044 Frascati, Italy; antonino.cataldo@lnf.infn.it

\* Correspondence: bellucci@lnf.infn.it (S.B.); laura.micheli@uniroma2.it (L.M.)

## Repeatability and Reproducibility (Statistical Tests)

The repeatability was studied for all concentrations using each nanomodified platform ( $n = 3$ , each concentration). Whereas, the reproducibility was checked using five equally prepared electrodes for each CNMs-based platform by analysing three UA concentrations 1, 10 (reported in the manuscript) and 100  $\mu\text{M}$ . The repeatability and reproducibility statistical tests for three different concentrations (1, 10, 100  $\mu\text{M}$ ) are reported in the following tables.

**Table S1.** Repeatability of CNMs-based UA-biosensors response.

| 1 $\mu\text{M}$   | Repeatability<br>Current Response ( $\mu\text{A}$ ) |               |             |      |      |          |
|-------------------|-----------------------------------------------------|---------------|-------------|------|------|----------|
|                   | $\text{CO}_2\text{H}$                               | $\text{NH}_2$ | $\text{OH}$ | MWNT | GNP  | Bare SPE |
|                   | 36.5                                                | 21.9          | 25.4        | 18.9 | 16.3 | 14.3     |
|                   | 37.7                                                | 22.7          | 24.3        | 17.8 | 14.7 | 16.1     |
|                   | 38.8                                                | 22.5          | 24.7        | 17.4 | 15.4 | 13.8     |
| RSD%              | 3                                                   | 2             | 2           | 4    | 5    | 8        |
| 10 $\mu\text{M}$  | 51.6                                                | 38.5          | 41.7        | 33.7 | 28.6 | 18.6     |
|                   | 51.5                                                | 37.3          | 42.5        | 34.1 | 28.4 | 22.2     |
|                   | 50.1                                                | 38.5          | 43.6        | 31.7 | 31.2 | 17.9     |
|                   |                                                     |               |             |      |      |          |
| RSD%              | 2                                                   | 2             | 2           | 4    | 5    | 12       |
| 100 $\mu\text{M}$ | 92.2                                                | 77.6          | 64.7        | 52.5 | 38.3 | 33.3     |
|                   | 91.1                                                | 78.3          | 62.2        | 49.7 | 36.1 | 24.5     |
|                   | 94.7                                                | 80.1          | 63.6        | 51.2 | 34.7 | 30.2     |
|                   |                                                     |               |             |      |      |          |
| RSD%              | 2                                                   | 2             | 2           | 3    | 5    | 14       |

**Table S2.** Reproducibility of CNMs-based UA-biosensors response.

| 1 $\mu$ M                    | Reproducibility<br>Current Response ( $\mu$ A) |                 |          |           |           |           |
|------------------------------|------------------------------------------------|-----------------|----------|-----------|-----------|-----------|
|                              | CO <sub>2</sub> H                              | NH <sub>2</sub> | OH       | MWNT      | GNP       | Bare SPE  |
|                              | 33.6                                           | 25.4            | 21.5     | 20.9      | 15.4      | 13.1      |
|                              | 38.1                                           | 24.2            | 22.6     | 17.8      | 14.9      | 16.4      |
|                              | 37.8                                           | 23.9            | 22.5     | 18.4      | 15.4      | 13.8      |
|                              | 35.5                                           | 22.1            | 20.7     | 15.6      | 16.6      | 15.9      |
|                              | 33.7                                           | 24.5            | 20.8     | 18.1      | 17.8      | 17.7      |
| <b>RSD%</b>                  | <b>6</b>                                       | <b>5</b>        | <b>4</b> | <b>12</b> | <b>7</b>  | <b>12</b> |
|                              |                                                |                 |          |           |           |           |
| <b>10 <math>\mu</math>M</b>  | 51.6                                           | 39.2            | 43.4     | 35.3      | 29.5      | 15.6      |
|                              | 52.3                                           | 36.7            | 44.5     | 31.2      | 28.4      | 21.2      |
|                              | 47.5                                           | 36.4            | 45.6     | 39.3      | 34.2      | 21.6      |
|                              | 46.8                                           | 36.8            | 41.2     | 32.6      | 26.9      | 17.5      |
|                              | 45.7                                           | 40.5            | 46.1     | 31.1      | 31.2      | 22.2      |
| <b>RSD%</b>                  | <b>6</b>                                       | <b>5</b>        | <b>4</b> | <b>10</b> | <b>9</b>  | <b>15</b> |
|                              |                                                |                 |          |           |           |           |
| <b>100 <math>\mu</math>M</b> | 89.9                                           | 75.5            | 61.4     | 47.5      | 31.3      | 32.3      |
|                              | 89.1                                           | 78.3            | 62.2     | 56.7      | 40.1      | 27.5      |
|                              | 95.2                                           | 80.6            | 60.6     | 49.3      | 38.1      | 35.2      |
|                              | 97.7                                           | 73.3            | 64.5     | 52.3      | 37.6      | 26.8      |
|                              | 96.2                                           | 76.6            | 66.2     | 54.1      | 42.9      | 25.9      |
| <b>RSD%</b>                  | <b>4</b>                                       | <b>4</b>        | <b>4</b> | <b>7</b>  | <b>11</b> | <b>14</b> |

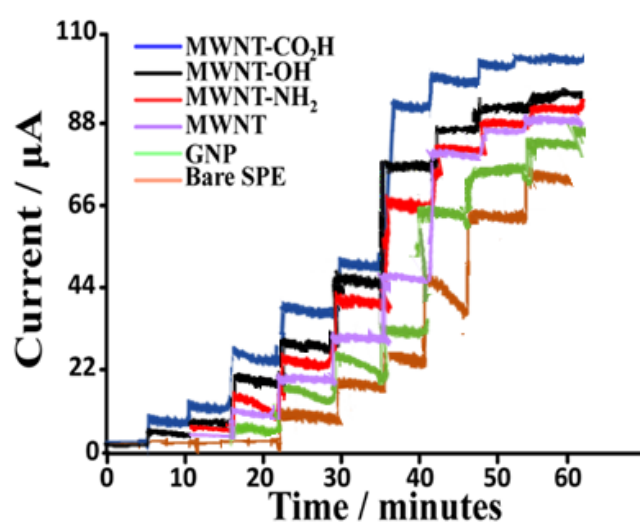**Figure S1.** The original experiment results exploited to create Figure 5a.
